# Supplementary material for: Multi-year particle fluxes in Kongsfjorden, Svalbard
Source: Copernicus journal article supplement (doi:10.5194/bg-2018-174), 2018-05-02
Supplement: Supplementary file [file bg-2018-174-AC1-supplement.pdf]

# AC to RCs 1

I'd like to thank you for the helpful comments. Following, the answers for each point.

**Answers to comments at “Discussion” section.** *The discussion section is a little bit long even though well written. I recommend to go over the discussion section again and try to shorten it here and there without losing substance.* The discussion section was slightly reduced in length, trying to maintain the original clarity.

**Answers to comments at figures.** *To reduce the number of graphs. The ms has a total of 12 graphs. Figures were reduced in number. Now they are 10 (2 less than the first version): the original “Fig. 2” is now “Fig. A1”, available in the Annexes section; Figs. 4 and 5 are now Fig. 3a and b. Here, it is shown the averaged time-series wind and current direction data in two graphs, respectively. Consequently, the numbering of all the figures was changed.*

## Minor comments:

*Page 4, line 6: I do not understand 5°C as unit for direction measurement?* It was just a typo error, we corrected it.

*Page 4, line 17: A dot is missing after (Karl and Knauer, 1989).* Corrected.

*Page 7, line 1: This wind conditions however have completely different effects on the surface waters because the effective area where the wind is able to affect the water surface is much larger. Therefore, intense wave formation happen only during these wind conditions while even much stronger wind coming from the south have less effects on the surface waters.* We agree with it.
